# Supplementary material for: Engineering graphene with red phosphorus quantum dots for superior hybrid anodes of sodium-ion batteries
Source: Royal Society of Chemistry journal article supplement (doi:10.1039/c7nr05470j), 2017-01-01
Supplement: c7nr05470j1.pdf [file c7nr05470j1.pdf]

## **Supporting Information**

### **Engineering Graphene with Red Phosphorus Quantum Dots for Superior Hybrid Anodes of Sodium-ion Batteries**

Guang Zeng,<sup>a,b</sup> Xiang Hu,<sup>a,b</sup> Baolong Zhou,<sup>a,b</sup> Junxiang Chen,<sup>a,b</sup> Changsheng Cao,<sup>a,b</sup> and Zhenhai Wen\*,<sup>a,b</sup>

<sup>a</sup> Key Laboratory of Design and Assembly of Functional Nanostructures, Fujian Institute of Research on the Structure of Matter, Chinese Academy of Sciences, Fuzhou 350002, P. R. China

<sup>b</sup> Fujian Provincial Key Laboratory of Nanomaterials, Fujian Institute of Research on the Structure of Matter, Chinese Academy of Sciences, Fuzhou 350002, P. R. China

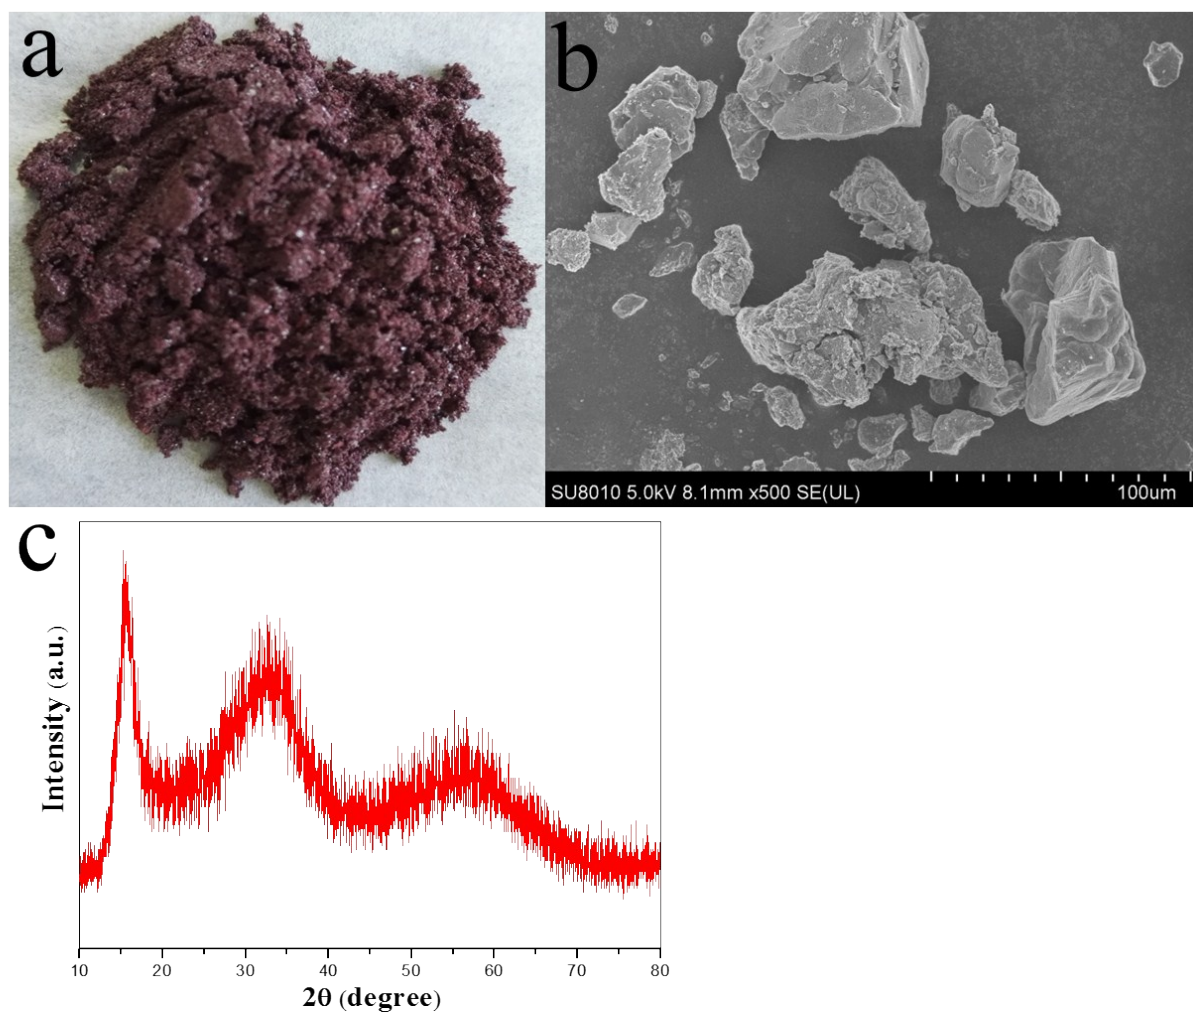

**Figure S1.** (a) Photo image, (b) SEM image and (c) XRD pattern of the commercial red phosphorus.

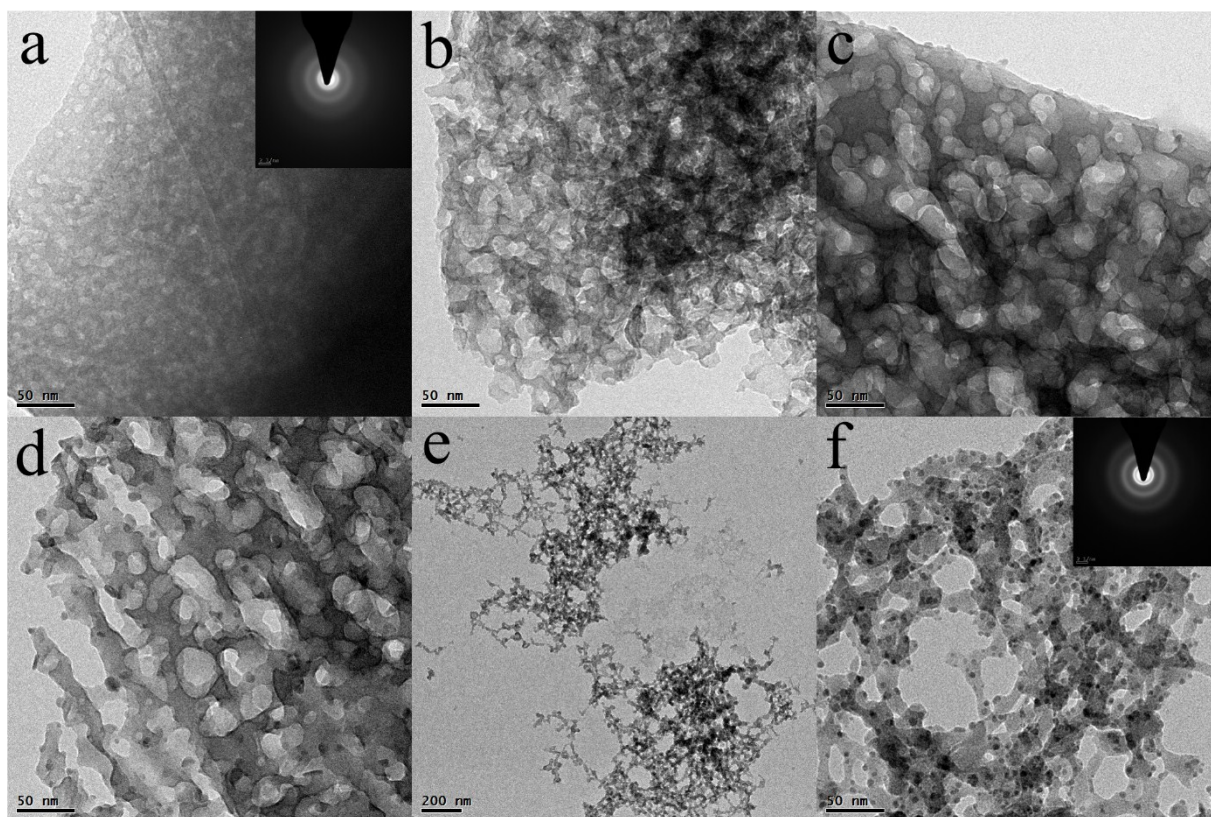

**Figure S2.** TEM images of red phosphorus after hydrothermal treatment at 200 °C for different time. (a) 2 h, (b) 6 h, (c) 12 h, (d) 18 h, and (e, f) 24 h. The insets are the SEAD patterns related to the red phosphorus after hydrothermal treatment at 200 °C for 2 h and 24 h, respectively.

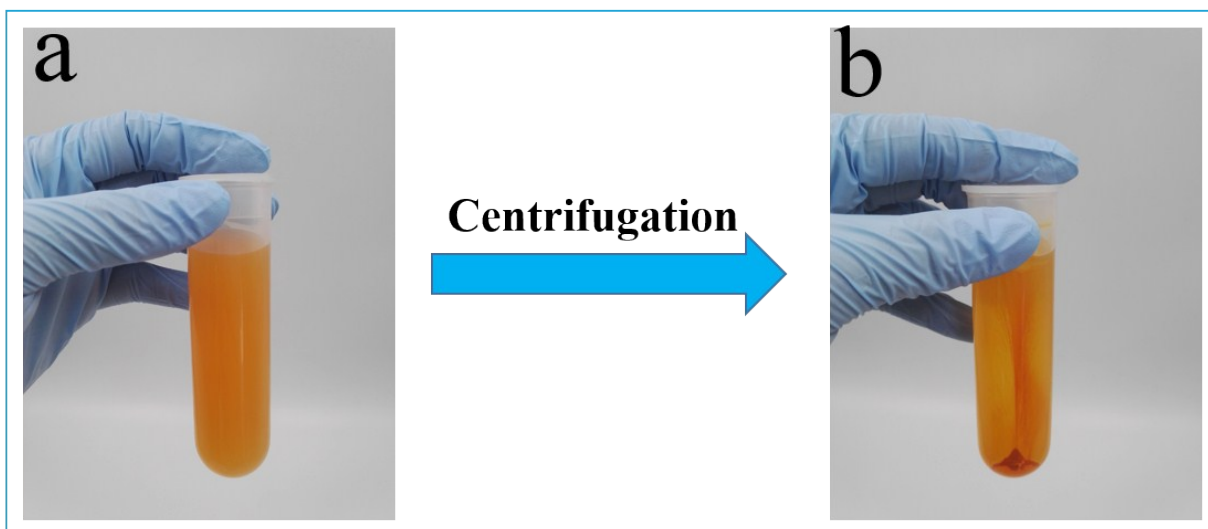

**Figure S3.** Optical images showing the separation process of RPQDs from RPNWs. (a) Digital camera image of ultracentrifuge tubes containing RPQDs and RPNWs solution; (b) Digital camera image of ultracentrifuge tubes containing RPQDs solution and RPNWs sedimentation after centrifugation at 8000 rpm for 30 min. After centrifugation, the 2/3 supernatant containing RPQDs was decanted.

**Table S1.** Zeta potential of GO and RPQDs after PAH modification.

| Materials           | GO     | RPQDs |
|---------------------|--------|-------|
| Zeta potential (mV) | -33.51 | 32.56 |

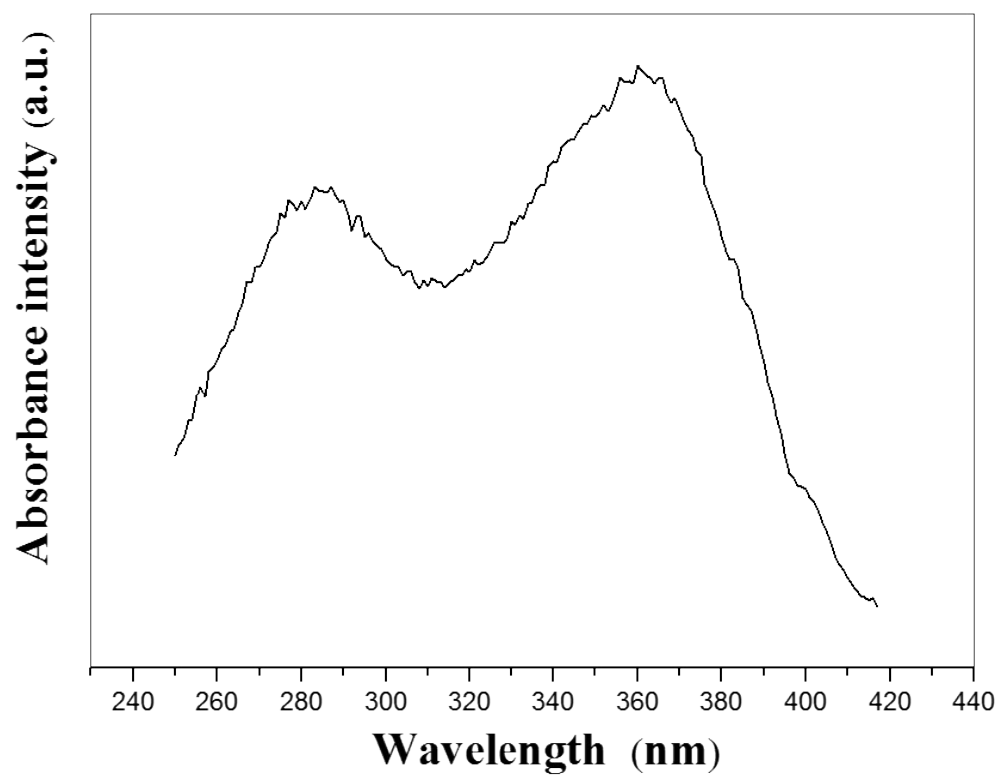

**Figure S4.** UV/Vis adsorption spectrum of RPQDs in water.

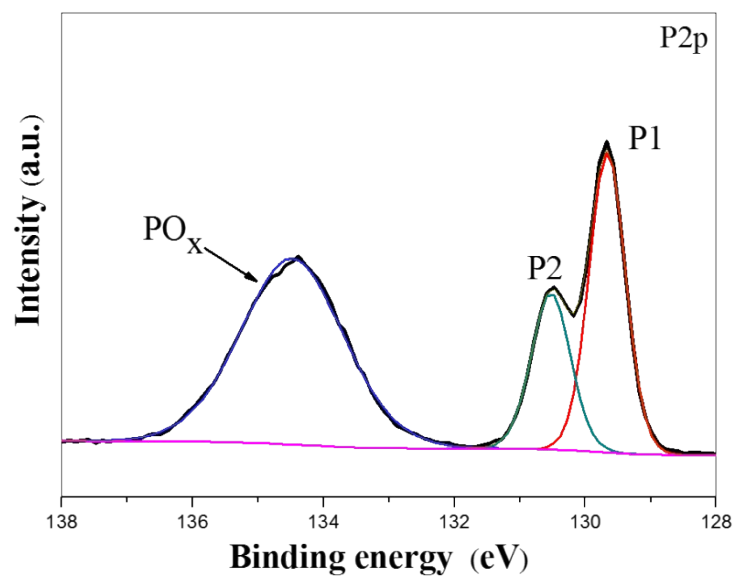

**Figure S5.** P2p XPS spectrum of commercial red phosphorus.

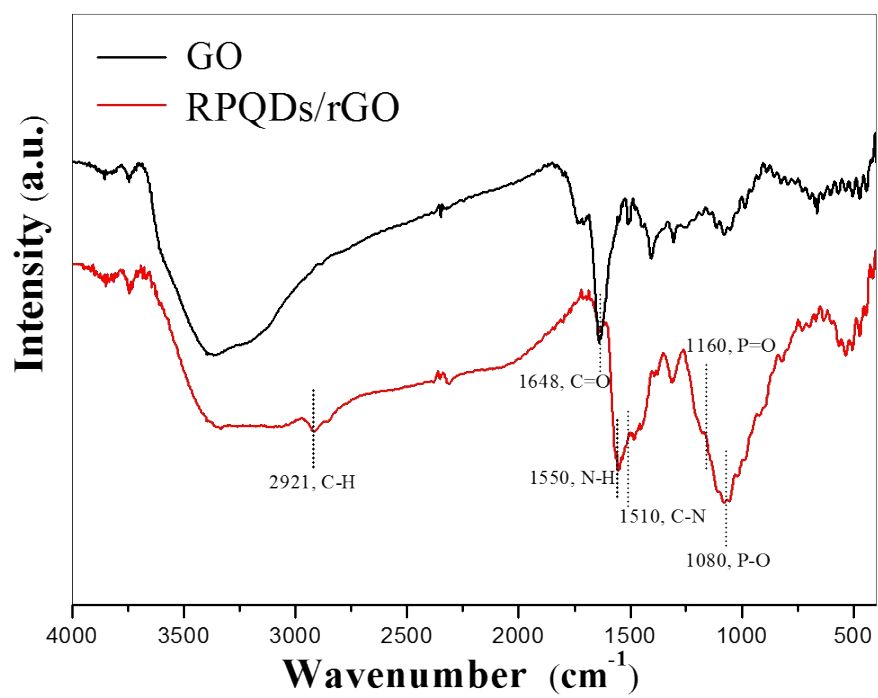

**Figure S6.** FT-IR spectra of GO and RPQDs/rGO hybrid.



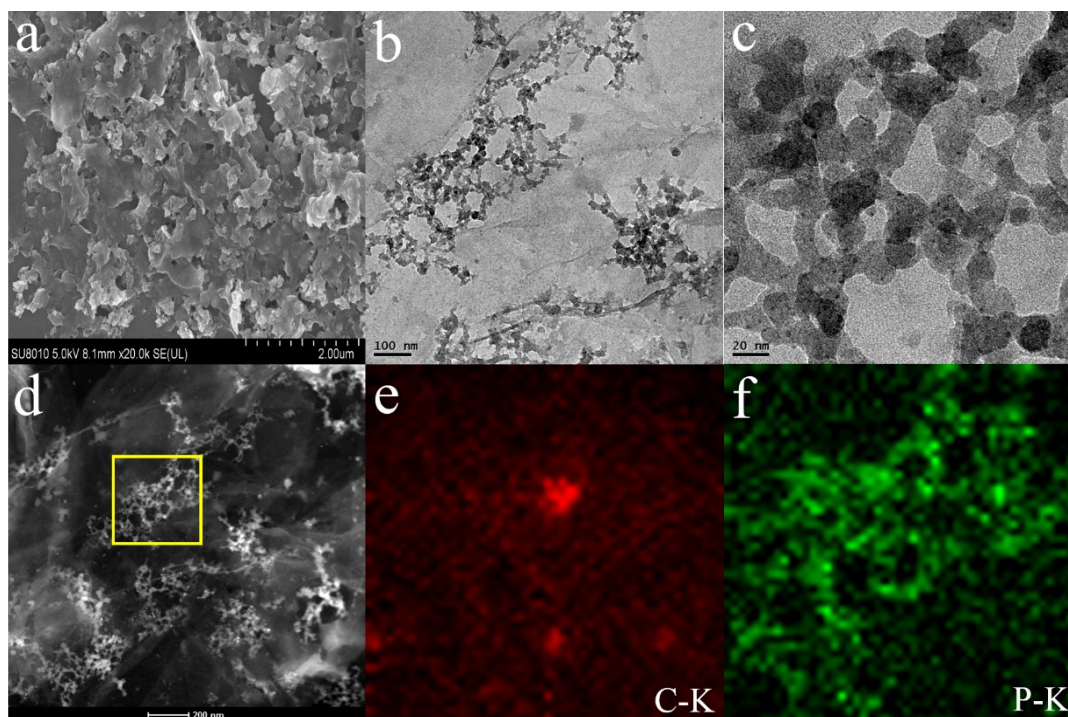

**Figure S7.** (a) SEM images of RPNWs/rGO hybrid; (b), (c) TEM images of RPNWs/rGO hybrid; (d) High angle annular dark-field STEM (HAADF-STEM) image and corresponding carbon (e) and phosphorus (f) elemental mappings of RPNWs/rGO hybrid.

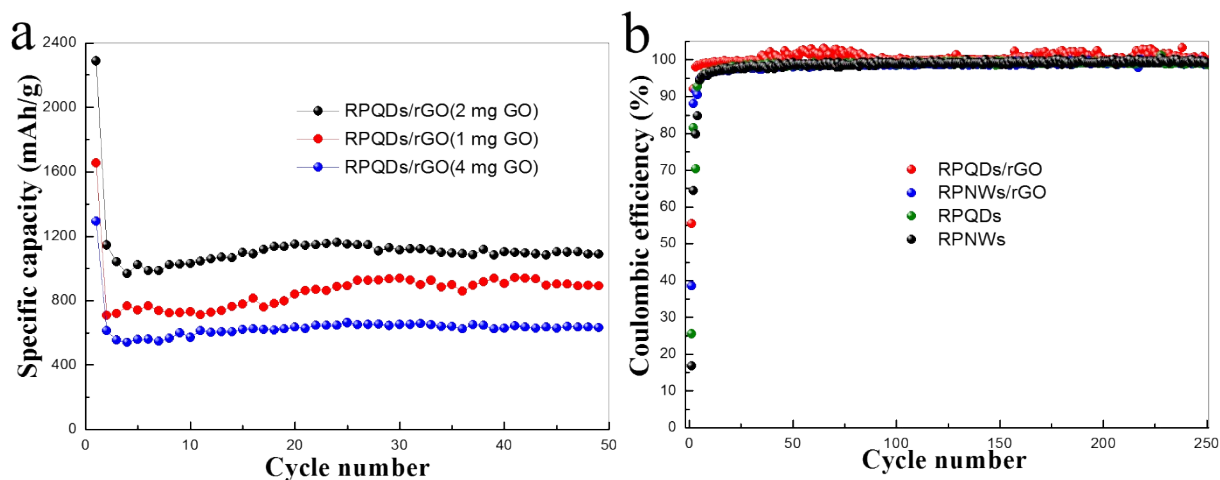

**Figure S8.** (a) Cycling performances of RPQDs/rGO electrodes with different GO addition during preparation process at a current density of 200 mA g<sup>-1</sup> cycled between 0.005 and 2.0 V vs. Na<sup>+</sup>/Na; (b) Coulombic efficiency of RPQDs/rGO hybrid, RPNWs/rGO hybrid, RPQDs and RPNWs electrodes at a current density of 200 mA g<sup>-1</sup>.



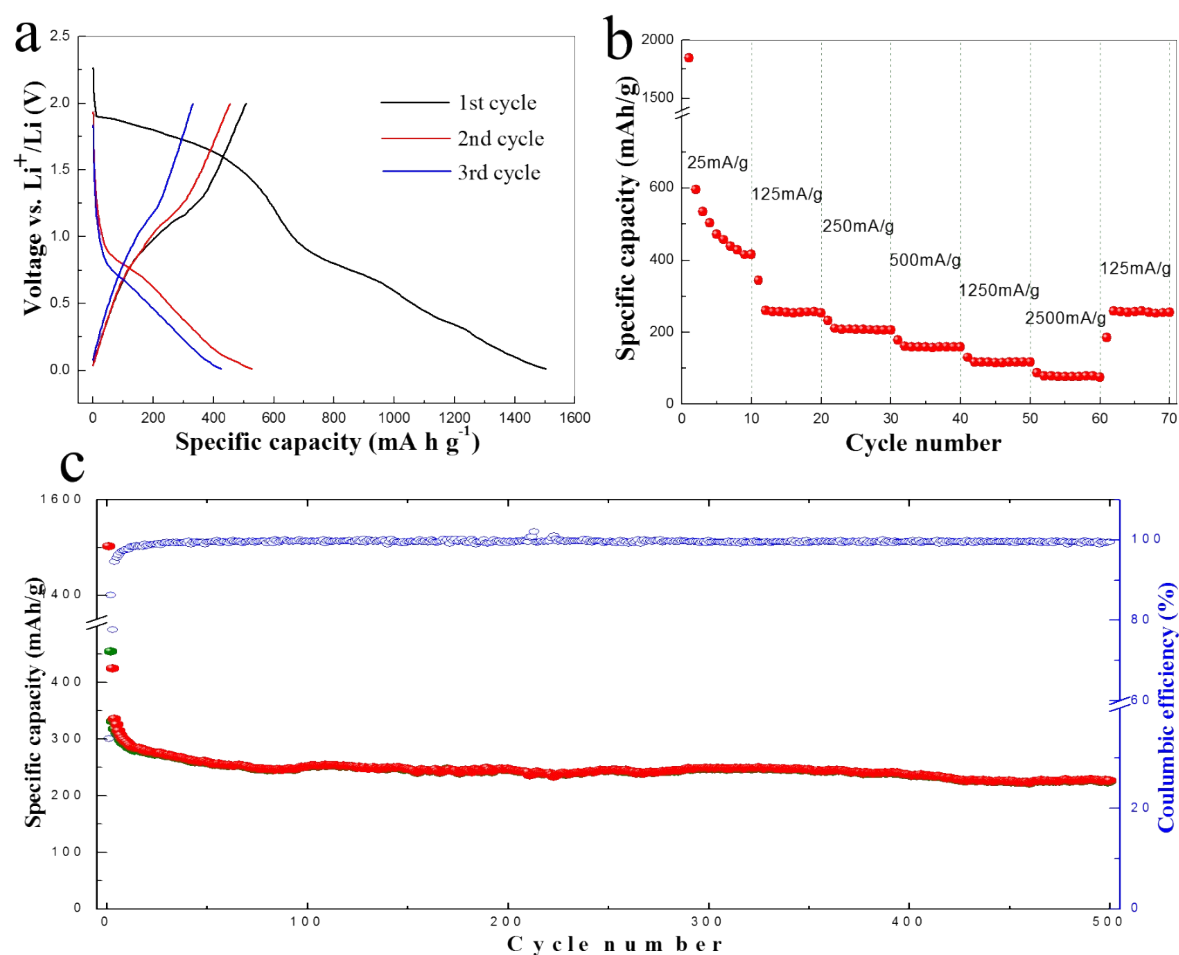

**Figure S9.** (a) Discharge-charge profiles of RPQDs at a current density of  $125 \text{ mA g}^{-1}$  for LIBs cycled between 0.005 and 2.0 V vs  $\text{Li}^+/\text{Li}$ ; (b) Rate performance of RPQDs electrode for LIBs; (c) Cycling performances of RPQDs with a current density of  $125 \text{ mA g}^{-1}$  for LIBs cycled between 0.005 and 2.0 V vs Li
